# Supplementary material for: Discontinuing Psychiatric Medications: A Survey of Long-Term Users
Source: Atypon-hosted journal article supplement (doi:10.1176/appi.ps.201700070), 2017-07-17
Supplement: appi.ps.201700070.ds001.pdf [file appi.ps.201700070.ds001.pdf]

**Respondent flow and sample:**

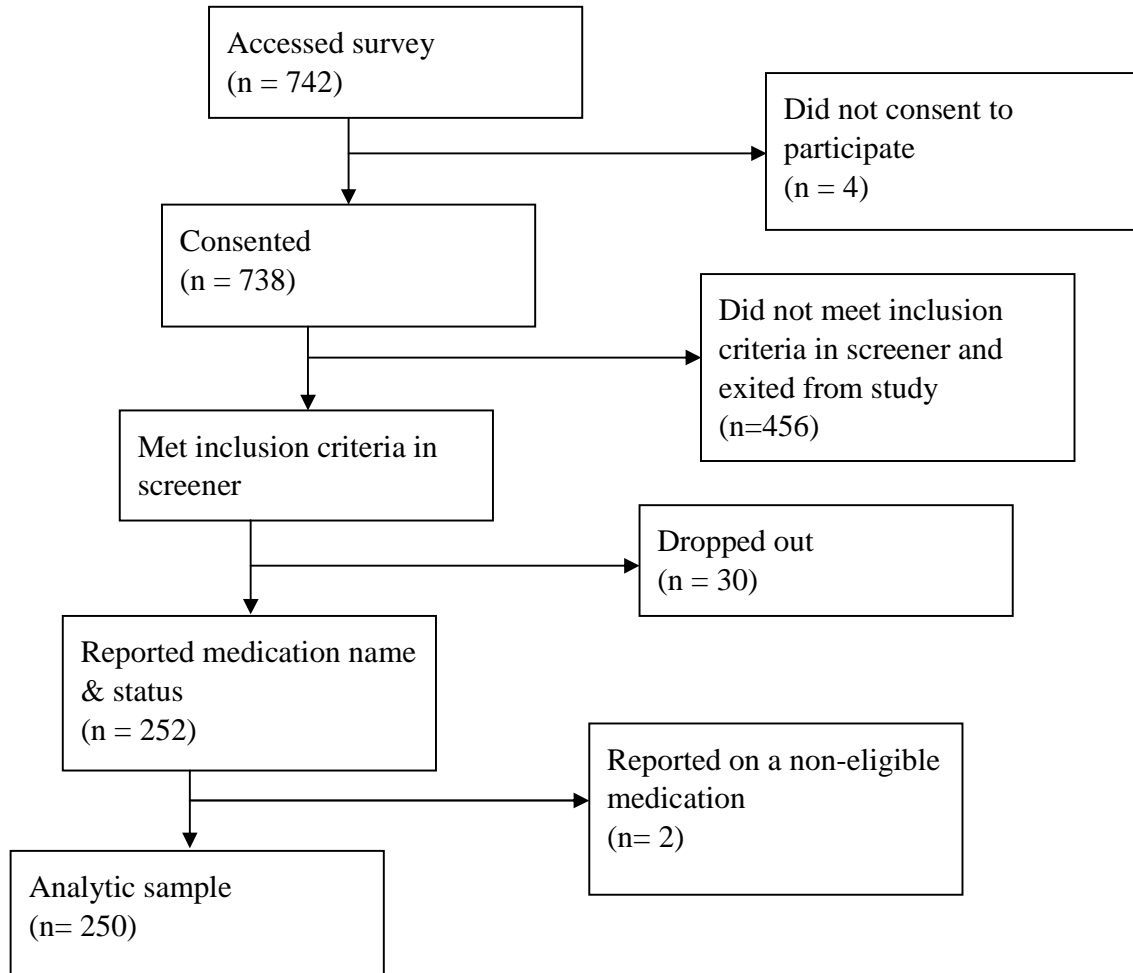

*Coping with Discontinuation:*

| Variable                               | Total N=250 |          |
|----------------------------------------|-------------|----------|
| <b>Self-Care Strategies Used</b>       | <b>N</b>    | <b>%</b> |
| Self-Education about coming off        | 174         | 76       |
| <i>Item nonresponse</i>                | 20          | --       |
| Being outdoors                         | 173         | 74       |
| <i>Item nonresponse</i>                | 15          | --       |
| Get Sleep                              | 156         | 67       |
| <i>Item nonresponse</i>                | 18          | --       |
| Being with pets/animals                | 153         | 67       |
| <i>Item nonresponse</i>                | 21          | --       |
| Expressing Feelings                    | 154         | 67       |
| <i>Item nonresponse</i>                | 21          | --       |
| Physical Exercise                      | 155         | 66       |
| <i>Item nonresponse</i>                | 15          | --       |
| Entertainment like TV, movies, reading | 142         | 63       |
| <i>Item nonresponse</i>                | 23          | --       |
| Dietary and nutritional changes        | 132         | 57       |
| <i>Item nonresponse</i>                | 17          | --       |
| Mindfulness/meditation                 | 134         | 57       |
| <i>Item nonresponse</i>                | 16          | --       |
| Being in water/baths                   | 125         | 55       |
| <i>Item nonresponse</i>                | 21          | --       |
| Hobbies                                | 115         | 55       |
| <i>Item nonresponse</i>                | 40          | --       |
| Journaling/Writing                     | 105         | 46       |
| <i>Item nonresponse</i>                | 20          | --       |
| Over the counter substances            | 88          | 39       |
| <i>Item nonresponse</i>                | 23          | --       |
| Reducing stimulation                   | 89          | 39       |
| <i>Item nonresponse</i>                | 24          | --       |
| Prayer/mantra/chanting                 | 86          | 38       |
| <i>Item nonresponse</i>                | 26          | --       |
